# Supplementary material for: Ionic self-assembled solid-like vesicles and their temperature-induced transformation
Source: Royal Society of Chemistry journal article supplement (doi:10.1039/b818006g), 2009-01-01
Supplement: b818006g.pdf [file b818006g.pdf]

## J. Mater. Chem.

### Electronic Supplementary Information

#### Ionic self-assembled solid-like vesicles and their temperature-induced transformation

Bo Jing, Xiao Chen,\* Yurong Zhao, Xudong Wang, Fumin Ma, and Xiu Yue

Key Lab of Colloid and Interface Chemistry, Ministry of Education, Shandong University, Jinan 250100,

P. R. China

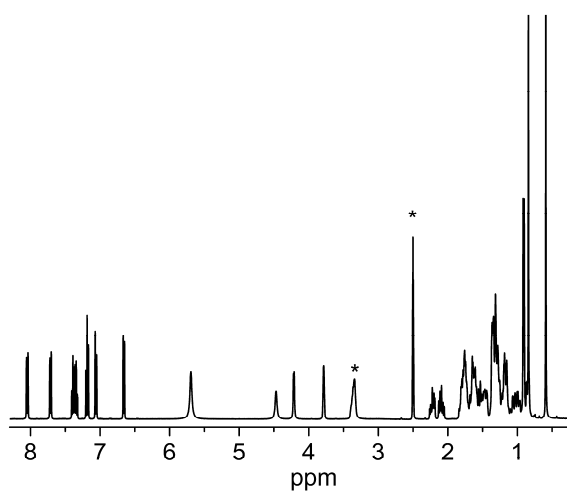

**Figure S1.**  $^1\text{H}$  NMR spectrum of NA-DC complexes in  $[\text{D}_6]\text{DMSO}$ . The asterisks denote the solvent peaks.

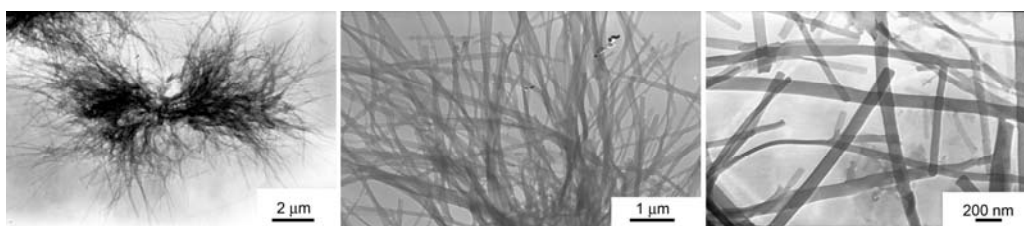

**Figure S2.** TEM images of nanobelts.

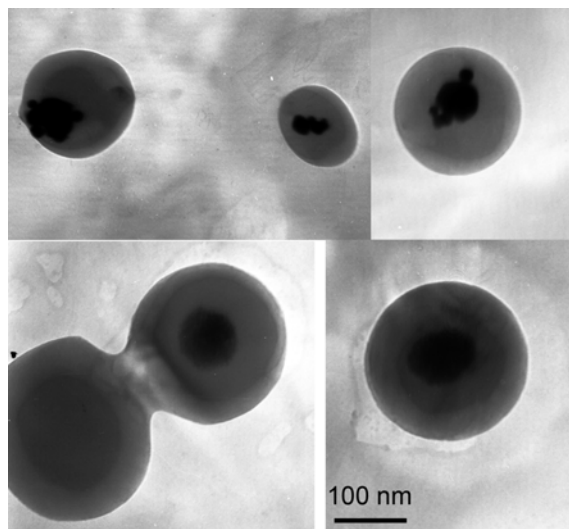

**Figure S3.** TEM image of single or interlinked vesicles with entrapped GNPs (top) and QDs (bottom).

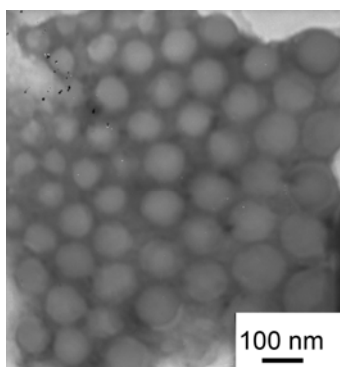

**Figure S4.** TEM image of nanospheres after evaporated in vacuum for 24 h.

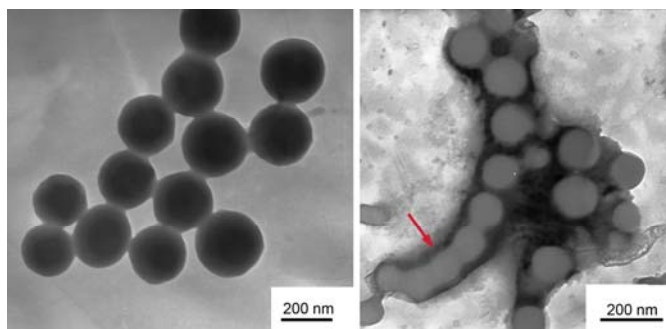

**Figure S5.** TEM images of vesicles (left) and linked disk-like nanostructures (right).

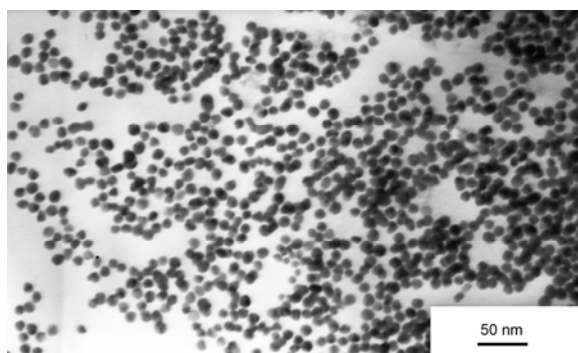

**Figure S6.** TEM image of gold nanoparticles.

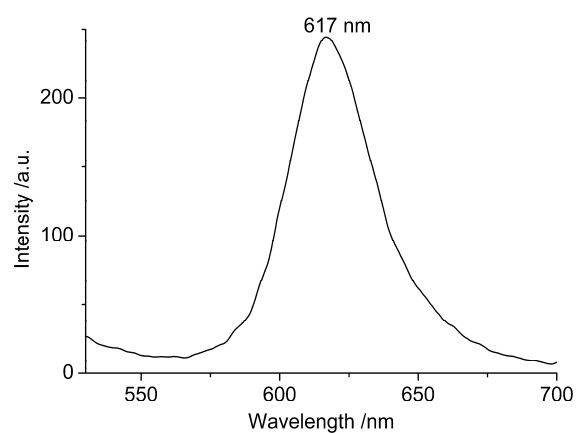

**Figure S7.** Fluorescence spectrum of QDs.
